# Supplementary material for: Acute Systemic Inflammatory Response Alters Transcription Profile of Genes Related to Immune Response and Ca2+ Homeostasis in Hippocampus; Relevance to Neurodegenerative Disorders
Source: PubMed Central journal article supplement (PMC7660108; doi:10.3390/ijms21217838), 2020-10-22
Supplement: ijms-21-07838-s001.pdf [file ijms-21-07838-s001.pdf]

## Supplementary materials

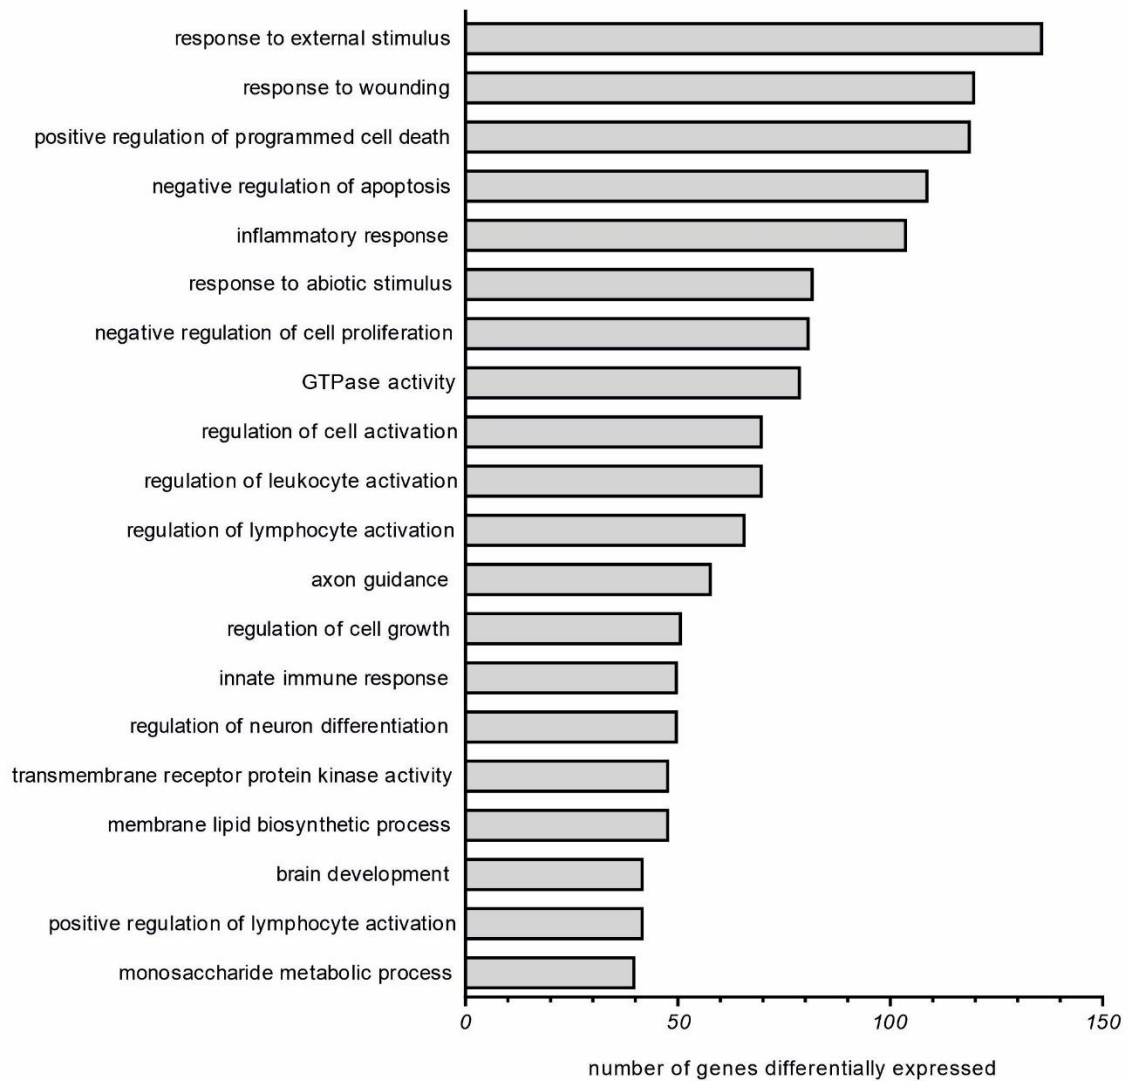

**Supplementary Figure 1. Functional categories represented by genes up- or downregulated by LPS (12 h).** Top 20 functional categories with p values <0.01 are shown.

**Supplementary Table 1. The list of all genes up- or downregulated 12 h after systemic administration of LPS (FDR<0.05; FC>2)**

Part A: List of all upregulated genes

| <b>Gene Symbol</b> | <b>Gene Title</b>                                            | <b>FC</b> |
|--------------------|--------------------------------------------------------------|-----------|
| <i>Lcn2</i>        | lipocalin 2                                                  | 237.80    |
| <i>Saa3</i>        | serum amyloid A 3                                            | 53.09     |
| <i>Ms4a6d</i>      | membrane-spanning 4-domains, subfamily A, member 6D          | 26.23     |
| <i>Gbp2</i>        | guanylate binding protein 2                                  | 22.32     |
| <i>Ctla2a</i>      | cytotoxic T lymphocyte-associated protein 2 alpha            | 15.50     |
| <i>Ccl5</i>        | chemokine (C-C motif) ligand 5                               | 14.31     |
| <i>Cxcl10</i>      | chemokine (C-X-C motif) ligand 10                            | 12.15     |
| <i>Lrg1</i>        | leucine-rich alpha-2-glycoprotein 1                          | 11.34     |
| <i>Ch25h</i>       | cholesterol 25-hydroxylase                                   | 10.43     |
| <i>Ctla2b</i>      | cytotoxic T lymphocyte-associated protein 2 beta             | 10.01     |
| <i>Mpa2l</i>       | macrophage activation 2 like                                 | 9.27      |
| <i>S3-12</i>       | plasma membrane associated protein, S3-12                    | 9.19      |
| <i>Timp1</i>       | tissue inhibitor of metalloproteinase 1                      | 8.93      |
| <i>Ms4a6b</i>      | membrane-spanning 4-domains, subfamily A, member 6B          | 8.91      |
| <i>A2m</i>         | alpha-2-macroglobulin                                        | 8.80      |
| <i>Osmr</i>        | oncostatin M receptor                                        | 7.58      |
| <i>Ifitm3</i>      | interferon induced transmembrane protein 3                   | 7.15      |
| <i>Mmp3</i>        | matrix metalloproteinase 3                                   | 7.03      |
| <i>Iigp1</i>       | interferon inducible GTPase 1                                | 6.98      |
| <i>Prg4</i>        | proteoglycan 4                                               | 6.42      |
| <i>Spp1</i>        | secreted phosphoprotein 1                                    | 6.42      |
| <i>Igtp</i>        | interferon gamma induced GTPase                              | 6.41      |
| <i>Rhoj</i>        | ras homolog gene family, member J                            | 6.10      |
| <i>Oasl2</i>       | 2'-5' oligoadenylate synthetase-like 2                       | 5.70      |
| <i>Ms4a6c</i>      | membrane-spanning 4-domains, subfamily A, member 6C          | 5.57      |
| <i>Saa1</i>        | serum amyloid A 1                                            | 5.45      |
| <i>Gbp3</i>        | guanylate binding protein 3                                  | 5.44      |
| <i>Socs3</i>       | suppressor of cytokine signaling 3                           | 5.32      |
| <i>Steap4</i>      | STEAP family member 4                                        | 5.24      |
| <i>Apod</i>        | apolipoprotein D                                             | 5.20      |
| <i>Cdkn1a</i>      | cyclin-dependent kinase inhibitor 1A (P21)                   | 5.18      |
| <i>Serpina3n</i>   | serine (or cysteine) peptidase inhibitor, clade A, member 3N | 5.10      |
| <i>Ifitm1</i>      | interferon induced transmembrane protein 1                   | 5.01      |
| <i>Cp</i>          | ceruloplasmin                                                | 4.81      |
| <i>Xdh</i>         | xanthine dehydrogenase                                       | 4.72      |
| <i>Pglyrp1</i>     | peptidoglycan recognition protein 1                          | 4.64      |
| <i>Tubb6</i>       | tubulin, beta 6                                              | 4.39      |

---

|                |                                                                                               |      |
|----------------|-----------------------------------------------------------------------------------------------|------|
| <i>Icam1</i>   | intercellular adhesion molecule 1                                                             | 4.36 |
| <i>Srgn</i>    | serglycin                                                                                     | 4.35 |
| <i>Slc10a6</i> | solute carrier family 10 (sodium/bile acid cotransporter family), member 6                    | 4.32 |
| <i>Angptl4</i> | angiopoietin-like 4                                                                           | 4.23 |
| <i>Ccl12</i>   | chemokine (C-C motif) ligand 12                                                               | 4.22 |
| <i>Pla1a</i>   | phospholipase A1 member A                                                                     | 4.21 |
| <i>Galnt12</i> | UDP-N-acetyl-alpha-D-galactosamine:polypeptide N-acetylgalactosaminyltransferase              | 4.16 |
| <i>Ly6a</i>    | lymphocyte antigen 6 complex, locus A                                                         | 4.14 |
| <i>Map3k6</i>  | mitogen-activated protein kinase kinase kinase 6                                              | 4.09 |
| <i>Mt2</i>     | metallothionein 2                                                                             | 4.01 |
| <i>Ifitm2</i>  | interferon induced transmembrane protein 2                                                    | 3.94 |
| <i>Cxcl1</i>   | chemokine (C-X-C motif) ligand 1                                                              | 3.91 |
| <i>Ucp2</i>    | uncoupling protein 2 (mitochondrial, proton carrier)                                          | 3.86 |
| <i>Igsf6</i>   | immunoglobulin superfamily, member 6                                                          | 3.77 |
| <i>Ada</i>     | adenosine deaminase                                                                           | 3.77 |
| <i>Tgm2</i>    | transglutaminase 2, C polypeptide                                                             | 3.65 |
| <i>Hspb1</i>   | heat shock protein 1                                                                          | 3.61 |
| <i>Irf7</i>    | interferon regulatory factor 7                                                                | 3.56 |
| <i>Gpr65</i>   | G-protein coupled receptor 65                                                                 | 3.53 |
| <i>Ifit3</i>   | interferon-induced protein with tetratricopeptide repeats 3                                   | 3.50 |
| <i>Fcgr2b</i>  | Fc receptor, IgG, low affinity IIb                                                            | 3.47 |
| <i>Adamts9</i> | a disintegrin-like and metallopeptidase (reprolysin type) with thrombospondin type 1 motif, 9 | 3.45 |
| <i>Hspb6</i>   | heat shock protein, alpha-crystallin-related, B6                                              | 3.41 |
| <i>Gbp6</i>    | guanylate binding protein 6                                                                   | 3.39 |
| <i>Msr1</i>    | macrophage scavenger receptor 1                                                               | 3.36 |
| <i>Rtp4</i>    | receptor transporter protein 4                                                                | 3.36 |
| <i>Fcgr4</i>   | Fc receptor, IgG, low affinity IV                                                             | 3.35 |
| <i>Irgm1</i>   | immunity-related GTPase family M member 1                                                     | 3.35 |
| <i>Pmaip1</i>  | phorbol-12-myristate-13-acetate-induced protein 1                                             | 3.32 |
| <i>Rsad2</i>   | radical S-adenosyl methionine domain containing 2                                             | 3.27 |
| <i>Cyp1b1</i>  | cytochrome P450, family 1, subfamily b, polypeptide 1                                         | 3.23 |
| <i>Cd44</i>    | CD44 antigen                                                                                  | 3.22 |
| <i>Adamts1</i> | a disintegrin-like and metallopeptidase (reprolysin type) with thrombospondin type 1 motif, 1 | 3.22 |
| <i>Arrdc2</i>  | arrestin domain containing 2                                                                  | 3.22 |
| <i>Ifit1</i>   | interferon-induced protein with tetratricopeptide repeats 1                                   | 3.19 |
| <i>Sult1a1</i> | sulfotransferase family 1A, phenol-preferring, member 1                                       | 3.19 |
| <i>Maff</i>    | v-maf musculoaponeurotic fibrosarcoma oncogene family, protein F (avian)                      | 3.18 |
| <i>Glipr2</i>  | GLI pathogenesis-related 2                                                                    | 3.12 |

---

---

|                 |                                                                                          |      |
|-----------------|------------------------------------------------------------------------------------------|------|
| <i>Trim30</i>   | tripartite motif-containing 30                                                           | 3.07 |
| <i>Ifi44</i>    | interferon-induced protein 44                                                            | 3.06 |
| <i>Acer2</i>    | alkaline ceramidase 2                                                                    | 3.05 |
| <i>Pp11r</i>    | placental protein 11 related                                                             | 3.03 |
| <i>Iigp2</i>    | interferon inducible GTPase 2                                                            | 3.02 |
| <i>Ifi47</i>    | interferon gamma inducible protein 47                                                    | 3.01 |
| <i>Cd14</i>     | CD14 antigen                                                                             | 3.00 |
| <i>Psmb8</i>    | proteasome (prosome, macropain) subunit, beta type 8 (large multifunctional peptidase 7) | 2.96 |
| <i>Serping1</i> | serine (or cysteine) peptidase inhibitor, clade G, member 1                              | 2.96 |
| <i>Sgk3</i>     | serum/glucocorticoid regulated kinase 3                                                  | 2.95 |
| <i>Gpr84</i>    | G protein-coupled receptor 84                                                            | 2.95 |
| <i>Lgals3bp</i> | lectin, galactoside-binding, soluble, 3 binding protein                                  | 2.94 |
| <i>Plaur</i>    | plasminogen activator, urokinase receptor                                                | 2.92 |
| <i>Nfkbia</i>   | nuclear factor of kappa light polypeptide gene enhancer in B-cells inhibitor, alpha      | 2.91 |
| <i>Cd93</i>     | CD93 antigen                                                                             | 2.90 |
| <i>Sgk1</i>     | serum/glucocorticoid regulated kinase 1                                                  | 2.89 |
| <i>Tap1</i>     | transporter 1, ATP-binding cassette, sub-family B (MDR/TAP)                              | 2.86 |
| <i>Ccl9</i>     | chemokine (C-C motif) ligand 9                                                           | 2.83 |
| <i>Tspan4</i>   | tetraspanin 4                                                                            | 2.79 |
| <i>Scara5</i>   | scavenger receptor class A, member 5 (putative)                                          | 2.78 |
| <i>Slfn4</i>    | schlafen 4                                                                               | 2.77 |
| <i>Apolo1</i>   | apolipoprotein L domain containing 1                                                     | 2.76 |
| <i>Agxt2l1</i>  | alanine-glyoxylate aminotransferase 2-like 1                                             | 2.76 |
| <i>Crispld2</i> | cysteine-rich secretory protein LCCL domain containing 2                                 | 2.75 |
| <i>Fcgr3</i>    | Fc receptor, IgG, low affinity III                                                       | 2.75 |
| <i>C5ar1</i>    | complement component 5a receptor 1                                                       | 2.74 |
| <i>Igfbp7</i>   | insulin-like growth factor binding protein 7                                             | 2.70 |
| <i>Bcl2a1a</i>  | B-cell leukemia/lymphoma 2 related protein A1a                                           | 2.70 |
| <i>Aspg</i>     | asparaginase homolog ( <i>S. cerevisiae</i> )                                            | 2.66 |
| <i>Csf3</i>     | colony stimulating factor 3 (granulocyte)                                                | 2.64 |
| <i>Sdc4</i>     | syndecan 4                                                                               | 2.62 |
| <i>Ctsc</i>     | cathepsin C                                                                              | 2.62 |
| <i>S100a11</i>  | S100 calcium binding protein A11 (calgizzarin)                                           | 2.62 |
| <i>Xaf1</i>     | XIAP associated factor 1                                                                 | 2.62 |
| <i>Scgb3a1</i>  | secretoglobin, family 3A, member 1                                                       | 2.61 |
| <i>Fkbp5</i>    | FK506 binding protein 5                                                                  | 2.61 |
| <i>Pla2g3</i>   | phospholipase A2, group III                                                              | 2.59 |
| <i>Ier3</i>     | immediate early response 3                                                               | 2.59 |
| <i>Ggta1</i>    | glycoprotein galactosyltransferase alpha 1, 3                                            | 2.58 |

---

---

|                 |                                                                                   |      |
|-----------------|-----------------------------------------------------------------------------------|------|
| <i>Il2rg</i>    | interleukin 2 receptor, gamma chain                                               | 2.57 |
| <i>Gimap6</i>   | GTPase, IMAP family member 6                                                      | 2.57 |
| <i>Ptx3</i>     | pentraxin related gene                                                            | 2.57 |
| <i>Tlr2</i>     | toll-like receptor 2                                                              | 2.56 |
| <i>Gp49a</i>    | glycoprotein 49 A                                                                 | 2.56 |
| <i>Emp1</i>     | epithelial membrane protein 1                                                     | 2.56 |
| <i>C3</i>       | complement component 3                                                            | 2.56 |
| <i>Herc5</i>    | hect domain and RLD 5                                                             | 2.56 |
| <i>Cebpd</i>    | CCAAT/enhancer binding protein (C/EBP), delta                                     | 2.55 |
| <i>Kcna5</i>    | potassium voltage-gated channel, shaker-related subfamily, member 5               | 2.55 |
| <i>Cd86</i>     | CD86 antigen                                                                      | 2.54 |
| <i>Txnip</i>    | thioredoxin interacting protein                                                   | 2.53 |
| <i>Plce1</i>    | phospholipase C, epsilon 1                                                        | 2.52 |
| <i>Rnf125</i>   | ring finger protein 125                                                           | 2.51 |
| <i>Ifi35</i>    | interferon-induced protein 35                                                     | 2.49 |
| <i>Parp3</i>    | poly (ADP-ribose) polymerase family, member 3                                     | 2.48 |
| <i>Fcer1g</i>   | Fc receptor, IgE, high affinity I, gamma polypeptide                              | 2.48 |
| <i>Mfsd2</i>    | major facilitator superfamily domain containing 2                                 | 2.46 |
| <i>Il1rn</i>    | interleukin 1 receptor antagonist                                                 | 2.46 |
| <i>Clec4a3</i>  | C-type lectin domain family 4, member a3                                          | 2.46 |
| <i>Pnpla2</i>   | patatin-like phospholipase domain containing 2                                    | 2.45 |
| <i>Gfap</i>     | glial fibrillary acidic protein                                                   | 2.44 |
| <i>Rasip1</i>   | Ras interacting protein 1                                                         | 2.44 |
| <i>Nudt6</i>    | nudix (nucleoside diphosphate linked moiety X)-type motif 6                       | 2.44 |
| <i>Csf2rb</i>   | colony stimulating factor 2 receptor, beta, low-affinity (granulocyte-macrophage) | 2.44 |
| <i>Hif3a</i>    | hypoxia inducible factor 3, alpha subunit                                         | 2.44 |
| <i>Atp2c2</i>   | ATPase, Ca <sup>++</sup> transporting, type 2C, member 2                          | 2.40 |
| <i>Mt1</i>      | metallothionein 1                                                                 | 2.39 |
| <i>Il1r2</i>    | interleukin 1 receptor, type II                                                   | 2.38 |
| <i>Tcfcp2l1</i> | transcription factor CP2-like 1                                                   | 2.37 |
| <i>C1r</i>      | complement component 1, r subcomponent                                            | 2.36 |
| <i>Zfp36</i>    | zinc finger protein 36                                                            | 2.35 |
| <i>Cd300lf</i>  | CD300 antigen like family member F                                                | 2.34 |
| <i>Msn</i>      | moesin                                                                            | 2.33 |
| <i>Arpc1b</i>   | actin related protein 2/3 complex, subunit 1B                                     | 2.31 |
| <i>Tlr7</i>     | toll-like receptor 7                                                              | 2.31 |
| <i>Ddc</i>      | dopa decarboxylase                                                                | 2.31 |
| <i>H2-L</i>     | histocompatibility 2, D region                                                    | 2.31 |
| <i>Ncf1</i>     | neutrophil cytosolic factor 1                                                     | 2.30 |
| <i>H2-D1</i>    | histocompatibility 2, D region locus 1                                            | 2.29 |

---

---

|                 |                                                        |      |
|-----------------|--------------------------------------------------------|------|
| <i>Anubl1</i>   | AN1, ubiquitin-like, homolog ( <i>Xenopus laevis</i> ) | 2.28 |
| <i>C3ar1</i>    | complement component 3a receptor 1                     | 2.27 |
| <i>Map3k8</i>   | mitogen-activated protein kinase kinase kinase 8       | 2.26 |
| <i>Ezr</i>      | ezrin                                                  | 2.25 |
| <i>Tnfrsf1a</i> | tumor necrosis factor receptor superfamily, member 1a  | 2.23 |
| <i>Parp14</i>   | poly (ADP-ribose) polymerase family, member 14         | 2.22 |
| <i>Cirbp</i>    | cold inducible RNA binding protein                     | 2.21 |
| <i>Lgals9</i>   | lectin, galactose binding, soluble 9                   | 2.21 |
| <i>H2-K1</i>    | histocompatibility 2, K1, K region                     | 2.20 |
| <i>Cd274</i>    | CD274 antigen                                          | 2.18 |
| <i>Mgp</i>      | matrix Gla protein                                     | 2.18 |
| <i>Rbm3</i>     | RNA binding motif protein 3                            | 2.18 |
| <i>Selp</i>     | selectin, platelet                                     | 2.17 |
| <i>Gpr182</i>   | G protein-coupled receptor 182                         | 2.16 |
| <i>Procr</i>    | protein C receptor, endothelial                        | 2.15 |
| <i>Angpt2</i>   | angiopoietin 2                                         | 2.14 |
| <i>Tmbim1</i>   | transmembrane BAX inhibitor motif containing 1         | 2.13 |
| <i>Tspo</i>     | translocator protein                                   | 2.12 |
| <i>Alox12b</i>  | arachidonate 12-lipoxygenase, 12R type                 | 2.12 |
| <i>Parp9</i>    | poly (ADP-ribose) polymerase family, member 9          | 2.11 |
| <i>Tsc22d3</i>  | TSC22 domain family, member 3                          | 2.10 |
| <i>Adm</i>      | adrenomedullin                                         | 2.10 |
| <i>Tmem176a</i> | transmembrane protein 176A                             | 2.10 |
| <i>Capg</i>     | capping protein (actin filament), gelsolin-like        | 2.10 |
| <i>Lyve1</i>    | lymphatic vessel endothelial hyaluronan receptor 1     | 2.07 |
| <i>Irf9</i>     | interferon regulatory factor 9                         | 2.07 |
| <i>Vim</i>      | vimentin                                               | 2.07 |
| <i>Il13ra1</i>  | interleukin 13 receptor, alpha 1                       | 2.07 |
| <i>Clic1</i>    | chloride intracellular channel 1                       | 2.06 |
| <i>Hck</i>      | hemopoietic cell kinase                                | 2.06 |
| <i>Cxcl9</i>    | chemokine (C-X-C motif) ligand 9                       | 2.06 |
| <i>Akap12</i>   | A kinase (PRKA) anchor protein (gravin) 12             | 2.06 |
| <i>Synpo</i>    | synaptopodin                                           | 2.05 |
| <i>Rhou</i>     | ras homolog gene family, member U                      | 2.05 |
| <i>Col5a3</i>   | collagen, type V, alpha 3                              | 2.05 |
| <i>Ddit4</i>    | DNA-damage-inducible transcript 4                      | 2.04 |
| <i>Anxa2</i>    | annexin A2                                             | 2.04 |
| <i>Psmb9</i>    | proteasome (prosome, macropain) subunit, beta type 9   | 2.03 |
| <i>Bcl3</i>     | B-cell leukemia/lymphoma 3                             | 2.01 |
| <i>Pycard</i>   | PYD and CARD domain containing                         | 2.01 |

---

## Part B: List of all downregulated genes (FDR&lt;0.05)

| Gene Symbol      | Gene Title                                                      | FC    |
|------------------|-----------------------------------------------------------------|-------|
| <i>Gpr34</i>     | G protein-coupled receptor 34                                   | -7.85 |
| <i>P2ry12</i>    | purinergic receptor P2Y, G-protein coupled 12                   | -4.61 |
| <i>Serpinb1a</i> | serine (or cysteine) peptidase inhibitor, clade B, member 1a    | -3.75 |
| <i>Akr1c14</i>   | aldo-keto reductase family 1, member C14                        | -3.56 |
| <i>Itm2a</i>     | integral membrane protein 2A                                    | -3.51 |
| <i>Cxcl12</i>    | chemokine (C-X-C motif) ligand 12                               | -3.45 |
| <i>Ugt8a</i>     | UDP galactosyltransferase 8A                                    | -3.10 |
| <i>Tek</i>       | endothelial-specific receptor tyrosine kinase                   | -3.06 |
| <i>Slco1c1</i>   | solute carrier organic anion transporter family, member 1c1     | -2.88 |
| <i>Slc40a1</i>   | solute carrier family 40 (iron-regulated transporter), member 1 | -2.71 |
| <i>Myoc</i>      | myocilin                                                        | -2.66 |
| <i>Abcb1a</i>    | ATP-binding cassette, sub-family B (MDR/TAP), member 1A         | -2.61 |
| <i>Slc22a8</i>   | solute carrier family 22 (organic anion transporter), member 8  | -2.60 |
| <i>Fabp7</i>     | fatty acid binding protein 7, brain                             | -2.60 |
| <i>Pllp</i>      | plasma membrane proteolipid                                     | -2.60 |
| <i>Aspa</i>      | aspartoacylase                                                  | -2.56 |
| <i>Pltp</i>      | phospholipid transfer protein                                   | -2.52 |
| <i>Slc47a1</i>   | solute carrier family 47, member 1                              | -2.44 |
| <i>Ptprb</i>     | protein tyrosine phosphatase, receptor type, B                  | -2.44 |
| <i>Olfml3</i>    | olfactomedin-like 3                                             | -2.39 |
| <i>Hist1h3b</i>  | histone cluster 1, H3b                                          | -2.36 |
| <i>Gjb1</i>      | gap junction protein, beta 1                                    | -2.34 |
| <i>Slc19a3</i>   | solute carrier family 19 (sodium/hydrogen exchanger), member 3  | -2.33 |
| <i>Gjc2</i>      | gap junction protein, gamma 2                                   | -2.31 |
| <i>Gulp1</i>     | GULP, engulfment adaptor PTB domain containing 1                | -2.29 |
| <i>Hist1h4a</i>  | histone cluster 1, H4a                                          | -2.24 |
| <i>Rlbp1</i>     | retinaldehyde binding protein 1                                 | -2.21 |
| <i>Opalin</i>    | oligodendrocytic myelin paranodal and inner loop protein        | -2.21 |
| <i>Tst</i>       | thiosulfate sulfurtransferase, mitochondrial                    | -2.20 |
| <i>Hist2h3c2</i> | histone cluster 2, H3c2                                         | -2.17 |
| <i>Rasgrp3</i>   | RAS, guanyl releasing protein 3                                 | -2.14 |
| <i>Tnc</i>       | tenascin C                                                      | -2.07 |
| <i>Ranbp3l</i>   | RAN binding protein 3-like                                      | -2.06 |
| <i>Ppp1r14a</i>  | protein phosphatase 1, regulatory (inhibitor) subunit 14A       | -2.06 |
| <i>Gng11</i>     | guanine nucleotide binding protein (G protein), gamma 11        | -2.06 |
| <i>Gldc</i>      | glycine decarboxylase                                           | -2.05 |
| <i>Hist1h3a</i>  | histone cluster 1, H3a                                          | -2.01 |

**Supplementary Table 2. List of the genes in most significantly altered top ten canonical pathways.**

| <b>Ingenuity Canonical Pathways</b>                    | <b>-log (p-value)</b> | <b>Ratio</b> | <b>Genes</b>                                                                                                                          |
|--------------------------------------------------------|-----------------------|--------------|---------------------------------------------------------------------------------------------------------------------------------------|
| Granulocyte adhesion and diapedesis                    | 1.13E+01              | 1.07E-01     | <i>C5ar1, Icam1, Mmp3, Tnfrsf1a, Ccl5, Sdc4, Csf3, Ccl9, Cxcl10, Il1r2, Selp, Ccl12, Il1rn, Ezr, Cxcl12, MMP12, CXCL2, Msn, Hspb1</i> |
| Agranulocyte adhesion and diapedesis                   | 8.07E+00              | 8.47E-02     | <i>C5ar1, Icam1, Mmp3, Tnfrsf1a, Sdc4, Ccl5, Ccl9, Cxcl10, Ccl12, Selp, Il1rn, Ezr, Cxcl12, MMP12, CXCL2, Msn</i>                     |
| Communication between innate and adaptive immune cells | 6.85E+00              | 9.17E-02     | <i>Cxcl10, Tlr2, Il1rn, HLA-B, Tlr7, Fcer1g, Cd86, Ccl5, HLA-E, Ccl9</i>                                                              |
| Acute phase response signaling                         | 6.20E+00              | 7.78E-02     | <i>C1r, Socs3, Serping1, Nfkbia, C3, Il1rn, Tnfrsf1a, Saa3, Saa1, Osmr, Serpina3n, Cp, LBP, A2m</i>                                   |
| Dendritic cell maturation                              | 5.85E+00              | 6.22E-02     | <i>Tlr2, Col5a3, Nfkbia, Plce1, Icam1, Il1rn, Tnfrsf1a, FCGR2A, HLA-B, Fcer1g, Cd86, Fcgr2b, FCGR3A</i>                               |
| LXR/RXR activation                                     | 5.63E+00              | 8.09E-02     | <i>Il1r2, C3, Msr1, Ccl12, Il1rn, Tnfrsf1a, Saa1, Cd14, LBP, PLTP, Apod</i>                                                           |
| Antigen presentation pathway                           | 5.29E+00              | 1.50E-01     | <i>Psmb9, NLRC5, HLA-B, Psmb8, Tap1, HLA-E</i>                                                                                        |
| Interferon signaling                                   | 5.09E+00              | 1.67E-01     | <i>Ifit3, Ifitm1, Ifi35, Irf9, Psmb8, Tap1</i>                                                                                        |
| IL-10 signaling                                        | 4.84E+00              | 1.03E-01     | <i>Il1r2, Socs3, Nfkbia, FCGR2A, Il1rn, Cd14, LBP, Fcgr2b</i>                                                                         |
| Atherosclerosis signaling                              | 4.76E+00              | 7.30E-02     | <i>Alox12b, Col5a3, Icam1, Msr1, Ccl12, Mmp3, Selp, Il1rn, Pla2g3, Apod</i>                                                           |

Ingenuity Pathway Analysis software (Ingenuity Systems) was used to analyze affected genes ( $p < 0.05$ ,  $FC > 2$ ) to identify the number of genes significantly associated with canonical pathways in the Ingenuity database. Top 10 pathways are presented.
